# Supplementary material
Source: Springer Nature journal article supplement (https://www.springermedizin.de/resource/supplementary/13014_2010_350_MOESM1_ESM.pdf/9633594)

A

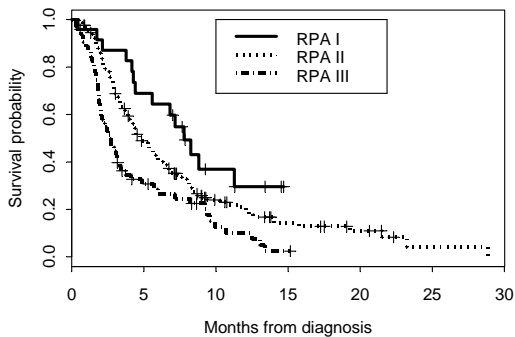

B

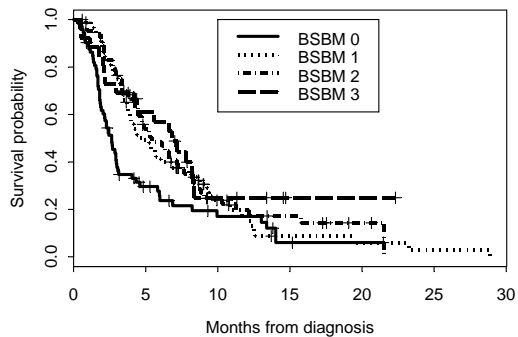

C

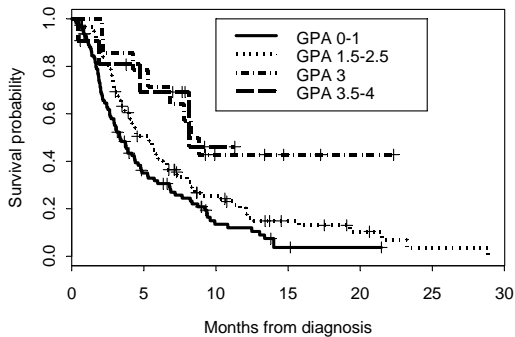

Supplement: MOESM1 [file 9633594]
